# Supplementary material for: Resolution of ranking hierarchies in directed networks
Source: PubMed Central journal article supplement (PMC5796714; doi:10.1371/journal.pone.0191604), 2018-02-02
Supplement: pone.0191604.s001.pdf [file pone.0191604.s001.pdf]

# Resolution of ranking hierarchies in directed networks

## Supporting information

Elisa Letizia, Paolo Barucca, Fabrizio Lillo

January 11, 2018

### Detailed proofs

In this Supporting material we present details and extended formulae for the propositions.

To start, we consider the values of agony for general  $d$  depending on the choice of the alternative rankings.

- **No inversion and splitting.** When  $b < 0$ , each class is divided into  $2^{-b}$  classes. As for the affinity matrix, the only part affected by the change in the ranking is the one above the diagonal, which has no impact on the computation of  $\mathbb{E}[A_d(G, r^{(b)})]$ . Hence one has

$$\mathbb{E}[A_d(G, r^{(b)})] = s \left( \frac{N}{R} 2^b \right)^2 \sum_{k=0}^{2^{2^{a-b}-1}} (k+1)^d (2^{a-b} - k). \quad (1)$$

- **No inversion and merging.** When  $b \geq 0$ , for any pair  $(i, j)$  it holds:

$$\mathbb{E}[m_{ij}] = \left( \frac{N}{R} \right)^2 \begin{cases} 2^{2^b} s & j < i \\ (2^b - 1)p + 2^{b-1}(2^b + 1)s + (2^{b-1} - 1)(2^b - 1)q & j = i \\ p + (2^{2^b} - 1)q & j = i + 1 \\ 2^{2^b} q & j > i + 1, \end{cases} \quad (2)$$

which gives

$$\begin{aligned} \mathbb{E}[A_d(G, r^{(b)})] = & s \left( \frac{N}{R} 2^b \right)^2 \sum_{k=1}^{2^{2^{a-b}-1}} (k+1)^d (2^{a-b} - k) + \\ & + 2^{a-b} ((2^b - 1)p + 2^{b-1}(2^b + 1)s + (2^{b-1} - 1)(2^b - 1)q) \end{aligned}$$

- **Inversion and merging.** When  $b \geq 0$  the expression for agony of the inverted ranking becomes

$$\begin{aligned} \mathbb{E}[A_d(G, r^{(i,b)})] = & 2^{2^b} \left( \frac{N}{R} \right)^2 q \sum_{k=2}^{2^{2^{a-b}-1}} (k+1)^d (2^{a-b} - k) + \\ & + 2^d \left( \frac{N}{R} \right)^2 (2^{a-b} - 1) ((2^{2^b} - 1)q + p) + \\ & + 2^{a-b} \left( \frac{N}{R} \right)^2 ((2^b - 1)p + (2^{b-1} - 1)(2^b - 1)q + 2^{b-1}(2^b + 1)s) \end{aligned}$$

- **Inversion and splitting** When  $b < 0$

$$\begin{aligned}\mathbb{E}[A_d(G, r^{(i,b)})] &= \left(\frac{N}{R}2^b\right)^2 \sum_{k=0}^{2^{2^{-b}-1}} (k+1)^d (2^a (2^{-b} - k) s + (2^a - 1) kp) + \\ &+ \left(\frac{N}{R}2^b\right)^2 \sum_{k=0}^{2^{2^{-b}-1}} (k+1 + 2^{-b})^d ((2^a - 1) (2^{-b} - k) p + (2^a - 2) kq) + \\ &+ \left(\frac{N}{R}2^b\right)^2 q \sum_{k=0}^{(2^a-2)2^{-b}} (k+1 + 2^{1-b})^d ((2^a - 2) 2^{-b} - k) .\end{aligned}$$

Then, we present the proofs of the propositions.

## Proof of Proposition 1

We explicitly show that in the  $d = 1$  case there exists critical values for  $s$  at which the planted ranking ceases to maximize hierarchy both for Twitter-like and Military-like hierarchies.

To determine the optimal number of classes we first treat  $b$  as a continuous variable and compute the derivative of  $\bar{h}_1$  with respect to it. The unique critical point is denoted by  $b^*$  and it is given by

$$b^* = \frac{1}{2} \log_2 \frac{2^{2a}s + 6(q-p)}{3q-s} .$$

Note that it must hold

$$0 \leq b \leq a$$

and we want to avoid the continuous relaxation at the boundaries so we consider the extreme values separately.

When  $p \geq q > s$  (*Twitter-like hierarchy*), we first notice that

$$\frac{\partial \bar{h}_1}{\partial b} \Big|_{b=b^*} < 0$$

Moreover, it holds

$$\bar{h}_1(b = a - 1) > \bar{h}_1(b = a) ,$$

that is the trivial ranking is never better than that with two classes.

Moreover, we denote with  $s_2$  the value of  $s$  such that the rankings with two and three classes have the same value of hierarchy, i.e.

$$\bar{h}_1(b = a - \log_2 3) = \bar{h}_1(b = a - 1) ,$$

since for any fixed  $b > 0$ ,  $\bar{h}_1$  is monotone decreasing with respect to  $s$ ,

$$\bar{h}_1(b = a - \log_2 3) < \bar{h}_1(b = a - 1) \forall s \geq s_2 .$$

Similarly, one can find the critical value  $s_m$  such that the ranking with of  $R - 1$  classes shares the value of hierarchy with the planted one,

$$\bar{h}_1(b = 0) = \bar{h}_1(b = a - \log_2 (2^a - 1)) .$$

Finally, we can combine the results to obtain the optimal number of classes for the direct ranking in the region  $p \geq q > s$ :

$$\tilde{R}^* = \begin{cases} R & s \leq s_m \\ 2^{a-b^*} & s_m < s < s_2 \\ 2 & s \geq s_2 , \end{cases} \quad (3)$$

where

$$\begin{aligned} s_m &= \frac{6(2^a - 1)p - 3(2^a - 2)q}{2^a - 4^a + 8^a} \\ s_2 &= \frac{3(4^a - 12)q + 12p}{4^a} \end{aligned} \quad (4)$$

With a reasoning similar to the one carried before, one gets that when  $p \geq q > s$  the optimal number of classes for the inverted ranking is such that

$$1 \leq \tilde{R}^* \leq 2$$

hence,

$$h_1^{i,*} \leq 0, \forall p \geq q > s, \forall a.$$

One can conclude that the optimal ranking for the twitter-like hierarchy is the direct one with a number of classes which depends on  $s$ , according to (??).

When  $q = 0$  (*Military-like hierarchy*), when it is defined, we have

$$\frac{\partial^2 \bar{h}_1}{\partial b^2} \Big|_{b=b^*} > 0,$$

so, to obtain the optimal directed ranking we only need to check the extreme values for  $b$ , i.e.  $b = 0$ ,  $b = a$ . The optimal number of classes for the direct ranking is given by

$$\tilde{R}^* = \begin{cases} R & s \leq s_m|_{q=0} \\ 1 & \text{otherwise,} \end{cases}$$

where

$$s_1 = \frac{6p}{2^a(1+2^a)}.$$

Then, one can consider the inverted ranking.

It easy to verify that

$$\mathbb{E}[A_1(G, r^{(i,b)})] > \mathbb{E}[A_1(G, r^{(p)})], \forall b < 0,$$

that is, also for the inverted ranking splitting is never optimal on average.

As for merging, the optimal choice for  $b$  is given by

$$b^{i,*} = \frac{1}{2} \log_2 \frac{2p}{s},$$

which is well defined when  $s > \frac{2}{4^a}p$  and satisfies  $\frac{a}{2} \leq b^{i,*} \leq a$ . The optimal number of classes from the inverted ranking is given by

$$\tilde{R}^{i,*} = \begin{cases} 1 & s \leq s_2^i \\ 2 & s_2^i < s \leq s_3^i \\ 2^{a-b^{i,*}} & s > s_3^i \end{cases},$$

where

$$\begin{aligned} s_2^i &= 2^{2-2a}p \\ s_3^i &= 3s_2^i. \end{aligned}$$

When  $s \leq s_1$ , the planted ranking is optimal and non zero and decreasing, and

$$s_2^i < s_1 < s_3^i. \quad (5)$$

Denote by  $s_i$  the value of  $s$  such that

$$\bar{h}_1^i(b = a - 1) = \bar{h}_1(b = 0).$$

One gets

$$s_i = \frac{12p}{3 \cdot 2^a + 2^{2a+1} - 2},$$

and when  $s > s_i$  the optimal inverted ranking has a higher value of hierarchy than the planted, which is the optimal directed one.

Finally, one can write the expression for the estimate of the optimal value of  $h$  in proposition ??.

For  $p \geq q > s$ ,

$$\bar{h}_1^* = \begin{cases} \frac{(2^a - 2)(-6(2^a - 1)q + 2^a(2^a + 2)s - 6p)}{6(2^a(2p - 3q + s) + 4^a(q + s) - 2p + 2q)} & s \leq s_m \\ \frac{3((4^a + 2)q - 2p)\sqrt{\frac{4^a s - 6p + 6q}{3q - s} - 2^{a+1}(4^a s - 6p + 6q)}}{3\sqrt{\frac{4^a s - 6p + 6q}{3q - s}}(2^a(2p - 3q + s) + 4^a(q + s) - 2p + 2q)} & s_m < s < s_2 \\ \frac{4^a(q - s) + 4p - 4q}{2(2^a(2p - 3q + s) + 4^a(q + s) - 2p + 2q)} & s \geq s_2. \end{cases}$$

When  $q = 0$ ,

$$\bar{h}_1^* = \begin{cases} \frac{2^a(6p + s) - 8^a s - 6p}{6(2^a - 1)p + 3 \cdot 2^a(2^a + 1)s} & s \leq s_i \\ \frac{4^a s - 4p}{2(2^a(2p + s) + 4^a s - 2p)} & s_i < s \leq s_3^i \\ \frac{-2^{a+\frac{3}{2}} s \sqrt{\frac{p}{s}} + 4^a s + 2p}{2^a(2p + s) + 4^a s - 2p} & s > s_3^i. \end{cases}$$

## Proof of Proposition 2

We here proceed to show that in the  $d = 0$  case (FAS), both for Twitter-like and Military-like hierarchies, agony is minimized by the ranking where nodes are partitioned in singletons. When  $b > 0$ , the derivative of  $h$  with respect to  $b$  is negative hence the planted ranking is better than any other with a fewer number of classes. Instead, when  $b < 0$  one has

$$\mathbb{E}[A_0(G, r^{(b)})] = s(2^a + 2^b) \left(\frac{N}{R}\right)^2$$

which implies

$$\mathbb{E}[A_0(G, r^{(b)})] < \mathbb{E}[A_0(G, r^{(p)})], \forall b < 0,$$

and

$$\frac{\partial \bar{h}_0}{\partial b} = -\frac{2^{a+b-1}}{m} s < 0 \quad \forall b < 0$$

So the optimal ranking is obtained for the limit value of  $b$

$$b^* = -\log_2 \frac{N}{R}, \quad \tilde{R}^* = N.$$

Similar computations give that any inverted ranking (i.e  $\forall b$ ) has never a higher value of hierarchy than the the ranking we just discussed.

One get the formula in proposition 2

$$h_0^* = 1 - \frac{2^{2a}(N + 1)s}{(2^{2a}(q + s) + 2^a(2p - 3q + s) - 2p + 2q)N}$$

### Proof of Proposition 3

For the case  $d = 2$  one can follow the same procedure we showed for  $d = 1$  and find the critical values for resolution threshold.

When  $p \geq q > s$ , the optimal number of classes is given by

$$\tilde{R}_2^* = \begin{cases} R & s \leq s_{2,m} \\ 2^{a-b_2^*} & s_{2,m} \leq s \leq s_{2,1} \\ 1 & s \geq s_{2,1}, \end{cases}$$

where

$$\begin{aligned} b_2^* &= \log_2 \left( \frac{2\sqrt[3]{2} (2^{2a}s - 3p + 3q)}{\sqrt[3]{\beta + 3^5 2^{3a}q^2s - 3^4 2^{3a+2}qs^2 + 3^3 2^{3a+2}s^3}} + \right. \\ &\quad \left. + \frac{\sqrt[3]{\frac{1}{3}\beta + 2^4 2^{3a}q^2s - 3^3 2^{3a+2}qs^2 + 3^2 2^{3a+2}s^3}}{\sqrt[3]{2} 3^2 (3q - 2s)} \right), \\ \beta &= \sqrt{3^6 2^{6a}s^2(3q - 2s)^4 - 2^5 3^3(3q - 2s)^3(4^a s - 3p + 3q)^3}. \end{aligned} \tag{6}$$

is the unique zero of the first order derivative of  $\bar{h}_2$  with respect to  $b$ , and

$$\begin{aligned} s_{2,m} &= \frac{6(2^{1-a}(q-p) + 2p - q)}{-3 \cdot 2^a + 2^{3a+1} + 4^a + 4} \\ s_{2,1} &= \frac{2^{2a}q + 4p - 4q}{3 \cdot 2^{2a}} \end{aligned}$$

with  $s_{2,1}$  being the value of  $s$  such that

$$\bar{h}_2(b = a - 1) = \bar{h}_2(b = a) = 0.$$

When  $q = 0$ , the planted ranking is optimal and gives positive  $\bar{h}_2$  when  $s < s_{2,1}^0$ , where

$$s_{2,1}^0 = \frac{3 \cdot 2^{2-a}p}{5 \cdot 2^a + 4^a + 4}.$$

For the inverted ranking instead one can compute the optimal choice for the number of classes, that is

$$\tilde{R}_2^{i,*} = \begin{cases} a & s \leq s_{2,2}^i \\ a - 1 & s_{2,2}^i p < s < s_{2,3}^i \\ \frac{\log(\frac{6p}{s})}{\log(4)} & s > s_{2,3}^i, \end{cases}$$

where

$$b_2^{i,*} = \frac{\log\left(\frac{6p}{s}\right)}{2 \log(2)},$$

and

$$\begin{aligned} s_{2,2}^i &= \frac{12}{2^{2a}p} \\ s_{2,3}^i &= 3s_{2,2}^i. \end{aligned}$$

For any choice of  $p$  and  $a$ , it holds

$$s_{2,1} < s_{2,2}^i,$$

so the inverted ranking is optimal for  $s > s_{2,2}^i$ .
