# Supplementary material for: Resolution of ranking hierarchies in directed networks
Source: PubMed Central journal article supplement (PMC5796714; doi:10.1371/journal.pone.0191604), 2018-02-02
Supplement: pone.0191604.s002.pdf [file pone.0191604.s002.pdf]

# Resolution of ranking hierarchies in directed networks

## S2 Table

Elisa Letizia, Paolo Barucca, Fabrizio Lillo

January 11, 2018

### **Numerical results**

For each network and for each class, the table contains the size of the class,  $n_i$ , as a percentage of the total number of nodes), the value of  $h$ , and the number of sub-classes inferred (R).

\* empty

Table 1: **Simulated graphs, details for classes**

| cl. | $s = 0.001$ |       |     | $s = 0.002$ |       |     | $s = 0.005$ |       |     | $s = 0.01$  |       |     |
|-----|-------------|-------|-----|-------------|-------|-----|-------------|-------|-----|-------------|-------|-----|
|     | $n_i(\%)$   | $h^*$ | $R$ | $n_i(\%)$   | $h^*$ | $R$ | $n_i(\%)$   | $h^*$ | $R$ | $n_i(\%)$   | $h^*$ | $R$ |
| 1   | <0.01       | 1*    | 1   | 0.03        | 1     | 3   | 0.03        | 1     | 11  | 0.03        | 0.95  | 12  |
| 2   | 0.03        | 1     | 3   | 0.03        | 1     | 3   | 0.03        | 1     | 8   | 0.06        | 0.93  | 5   |
| 3   | 0.03        | 1     | 4   | 0.03        | 0.88  | 3   | 0.03        | 1     | 7   | 0.06        | 0.93  | 6   |
| 4   | 0.03        | 1     | 3   | 0.03        | 1     | 4   | 0.03        | 0.98  | 7   | 0.09        | 0.93  | 5   |
| 5   | 0.03        | 1     | 3   | 0.03        | 1     | 3   | 0.06        | 0.97  | 7   | 0.09        | 0.94  | 5   |
| 6   | 0.03        | 1     | 3   | 0.03        | 1     | 4   | 0.06        | 0.97  | 7   | 0.095       | 0.95  | 5   |
| 7   | 0.03        | 1     | 3   | 0.03        | 1     | 5   | 0.06        | 0.97  | 10  | 0.09        | 0.94  | 6   |
| 8   | 0.03        | 1     | 2   | 0.03        | 1     | 5   | 0.06        | 0.97  | 9   | 0.09        | 0.93  | 6   |
| 9   | 0.03        | 1     | 3   | 0.03        | 1     | 3   | 0.06        | 0.96  | 8   | 0.09        | 0.94  | 7   |
| 10  | 0.03        | 1     | 2   | 0.03        | 1     | 4   | 0.06        | 0.97  | 8   | 0.09        | 0.94  | 6   |
| 11  | 0.03        | 1     | 3   | 0.03        | 1     | 4   | 0.06        | 0.97  | 11  | 0.06        | 0.93  | 6   |
| 12  | 0.03        | 1     | 2   | 0.045       | 0.99  | 5   | 0.06        | 0.97  | 6   | 0.06        | 0.94  | 7   |
| 13  | 0.03        | 1     | 4   | 0.05        | 0.99  | 6   | 0.06        | 0.97  | 10  | 0.03        | 0.87  | 10  |
| 14  | 0.03        | 1     | 2   | 0.05        | 0.99  | 8   | 0.06        | 0.97  | 8   | 0.03        | 0.91  | 16  |
| 15  | 0.03        | 1     | 3   | 0.05        | 0.98  | 7   | 0.06        | 0.97  | 7   |             |       |     |
| 16  | 0.03        | 1     | 2   | 0.05        | 0.99  | 6   | 0.06        | 0.97  | 7   |             |       |     |
| 17  | 0.03        | 1     | 3   | 0.04        | 0.99  | 5   | 0.03        | 0.94  | 7   |             |       |     |
| 18  | 0.03        | 1     | 3   | 0.03        | 1     | 5   | 0.03        | 1     | 6   |             |       |     |
| 19  | 0.03        | 1     | 3   | 0.03        | 1     | 4   | 0.03        | 1     | 9   |             |       |     |
| 20  | 0.03        | 1     | 3   | 0.03        | 1     | 5   | 0.03        | 1     | 7   |             |       |     |
| 21  | 0.03        | 1     | 3   | 0.03        | 1     | 4   |             |       |     |             |       |     |
| 22  | 0.03        | 1     | 3   | 0.03        | 1     | 4   |             |       |     |             |       |     |
| 23  | 0.03        | 1     | 3   | 0.03        | 1     | 4   |             |       |     |             |       |     |
| 24  | 0.03        | 1     | 3   | 0.03        | 1     | 3   |             |       |     |             |       |     |
| 25  | 0.03        | 1     | 5   | 0.03        | 1     | 4   |             |       |     |             |       |     |
| 26  | 0.03        | 1     | 3   | 0.03        | 1     | 5   |             |       |     |             |       |     |
| 27  | 0.03        | 1     | 3   | 0.03        | 1     | 4   |             |       |     |             |       |     |
| 28  | 0.03        | 1     | 3   | 0.03        | 1     | 3   |             |       |     |             |       |     |
| 29  | 0.03        | 1     | 2   | 0.03        | 1     | 5   |             |       |     |             |       |     |
| 30  | 0.03        | 1     | 3   |             |       |     |             |       |     |             |       |     |
| 31  | 0.03        | 1     | 4   |             |       |     |             |       |     |             |       |     |
| 32  | 0.03        | 1     | 3   |             |       |     |             |       |     |             |       |     |
| 33  | 0.03        | 1     | 3   |             |       |     |             |       |     |             |       |     |
| 34  | <0.01       | 1*    | 1   |             |       |     |             |       |     |             |       |     |
| cl. | $s = 0.048$ |       |     | $s = 0.112$ |       |     | $s = 0.224$ |       |     | $s = 0.448$ |       |     |
|     | $n_i(\%)$   | $h$   | $R$ | $n_i(\%)$   | $h$   | $R$ | $n_i(\%)$   | $h$   | $R$ | $n_i(\%)$   | $h$   | $R$ |
| 1   | 0.06        | 0.71  | 4   | 0.18        | 0.44  | 4   | 0.27        | 0.21  | 3   | 0.51        | 0.03  | 2   |
| 2   | 0.16        | 0.70  | 6   | 0.32        | 0.42  | 5   | 0.48        | 0.20  | 3   | 0.49        | 0.03  | 2   |
| 3   | 0.22        | 0.67  | 7   | 0.32        | 0.42  | 4   | 0.26        | 0.21  | 3   |             |       |     |
| 4   | 0.22        | 0.67  | 7   | 0.18        | 0.44  | 4   |             |       |     |             |       |     |
| 5   | 0.19        | 0.69  | 7   |             |       |     |             |       |     |             |       |     |
| 6   | 0.12        | 0.72  | 4   |             |       |     |             |       |     |             |       |     |
| 7   | 0.03        | 0.35  | 5   |             |       |     |             |       |     |             |       |     |
