# Supplementary material for: Resolution of ranking hierarchies in directed networks
Source: PubMed Central journal article supplement (PMC5796714; doi:10.1371/journal.pone.0191604), 2018-02-02
Supplement: pone.0191604.s003.pdf [file pone.0191604.s003.pdf]

# Resolution of ranking hierarchies in directed networks

## S3 Table

Elisa Letizia, Paolo Barucca, Fabrizio Lillo

January 11, 2018

### Numerical results

For each network and for each class, the table contains the size of the class,  $n_i$ , as a percentage of the total number of nodes), the value of  $h$ , and the number of sub-classes inferred ( $R$ ).

Table 1: **Real networks: details for classes**

| cl. | Wikivote  |       |     | HiggsReply |       |     | HiggsMention |       |     | Amazon    |        |     |
|-----|-----------|-------|-----|------------|-------|-----|--------------|-------|-----|-----------|--------|-----|
|     | $n_i(\%)$ | $h^*$ | $R$ | $n_i(\%)$  | $h^*$ | $R$ | $n_i(\%)$    | $h^*$ | $R$ | $n_i(\%)$ | $h^*$  | $R$ |
| 1   | 0.67      | 1*    | 1   | 0.60       | 0.03  | 2   | 0.77         | 0.13  | 2   | 0.02      | < 0.01 | 3   |
| 2   | 0.01      | 0     | 1   | 0.31       | 0.34  | 2   | 0.16         | 0.78  | 4   | 0.03      | 0.01   | 3   |
| 3   | < 0.01    | 0.24  | 3   | 0.04       | 0.64  | 2   | 0.03         | 0.78  | 3   | 0.10      | 0.01   | 3   |
| 4   | 0.01      | 0.38  | 6   | 0.01       | 1     | 2   | 0.01         | 0.80  | 2   | 0.20      | 0.01   | 5   |
| 5   | 0.02      | 0.26  | 5   | < 0.01     | 0.50  | 2   | < 0.01       | 0.81  | 2   | 0.25      | 0.05   | 6   |
| 6   | 0.04      | 0.23  | 6   | < 0.01     | 1     | 2   | < 0.01       | 0.85  | 2   | 0.20      | 0.08   | 6   |
| 7   | 0.06      | 0.20  | 5   | < 0.01     | 1     | 3   | < 0.01       | 0.53  | 2   | 0.11      | 0.08   | 6   |
| 8   | 0.09      | 0.32  | 8   | < 0.01     | 0.67  | 5   | < 0.01       | 0.65  | 3   | 0.06      | 0.07   | 5   |
| 9   | 0.08      | 0.72  | 10  | 0.01       | 0.24  | 2   | < 0.01       | 0.66  | 4   | 0.02      | 0.06   | 5   |
| 10  | 0.04      | 1     | 2   | < 0.01     | 0.83  | 2   | < 0.01       | 0.55  | 4   | 0.01      | 0.05   | 5   |
| 11  | < 0.01    | 0     | 1   | < 0.01     | 1*    | 1   | < 0.01       | 0.59  | 7   | < 0.01    | 0.06   | 4   |
| 12  | < 0.01    | 1*    | 1   | < 0.01     | 1*    | 1   | < 0.01       | 0.46  | 6   | < 0.01    | 0.05   | 4   |
| 13  |           |       |     | < 0.01     | 1*    | 1   | < 0.01       | 0.60  | 6   | < 0.01    | 0.04   | 3   |
| 14  |           |       |     |            |       |     | < 0.01       | 0.66  | 6   | < 0.01    | 0.05   | 4   |
| 15  |           |       |     |            |       |     | < 0.01       | 0.82  | 1   | < 0.01    | 0.07   | 3   |
| 16  |           |       |     |            |       |     | < 0.01       | 0.69  | 1   | < 0.01    | 0.05   | 3   |
| 17  |           |       |     |            |       |     | < 0.01       | 1*    | 1   | < 0.01    | 0      | 1   |
| 18  |           |       |     |            |       |     | < 0.01       | 1*    | 1   |           |        |     |
| 19  |           |       |     |            |       |     | < 0.01       | 1*    | 1   |           |        |     |
| 20  |           |       |     |            |       |     | < 0.01       | 1*    | 1   |           |        |     |

\* empty
